# Supplementary material
Source: publisher figshare collection journal article supplement (https://tandf.figshare.com/ndownloader/files/14064857)

**Supplemental Figure 1.** The patient’s peripheral blood smear on admission revealed erythroblasts, hypochromia, sickle cells and target cells.


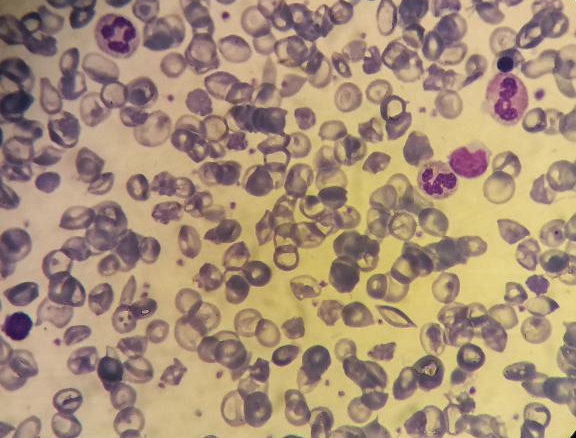

Supplement: Supplementary file 1 [file 14064857]
